# Supplementary material for: A peculiar case of Campylobacter jejuni attenuated aspartate chemosensory mutant, able to cause pathology and inflammation in avian and murine model animals
Source: PubMed Central journal article supplement (PMC6105663; doi:10.1038/s41598-018-30604-5), 2018-08-22
Supplement: 41598_2018_30604_MOESM2_ESM.pdf [file 41598_2018_30604_MOESM2_ESM.pdf]

A peculiar case of *Campylobacter jejuni* attenuated aspartate chemosensory mutant, able to cause pathology and inflammation in avian and murine model animals.

L.E. Hartley-Tassell, C.J. Day, E.A. Semchenko, G. Tram, L.I. Calderon-Gomez, Z. Klipic, A. M. Barry, A.K. Lam, M.A. McGuckin, V. Korolik.

Supplementary Table 1 Bacterial presence in systemic and digestive organs of mice infected with *C. jejuni* strains.

| <i>C. jejuni</i> strain  | Organ           | 24 hours | 48 hours | 72 hours | 96 hours |
|--------------------------|-----------------|----------|----------|----------|----------|
| 11168 $\Delta$ ccaA::cat | Lungs           | 0/10     | 1/10     | 0/10     | 1/10     |
|                          | Liver           | 1/10     | 2/10     | 1/10     | 1/10     |
|                          | Spleen          | 0/10     | 0/10     | 0/10     | 0/10     |
|                          | Small intestine | 9/9      | 8/10     | 10/10    | 8/10     |
|                          | Large intestine | 10/10    | 10/10    | 9/10     | 10/10    |
| 11168-O                  | Lungs           | 0/10     | 0/10     | 0/10     | 0/10     |
|                          | Liver           | 0/10     | 0/10     | 0/10     | 0/10     |
|                          | Spleen          | 0/10     | 0/10     | 0/10     | 0/10     |
|                          | Small intestine | 3/10     | 4/10     | 7/10     | 8/10     |
|                          | Large intestine | 7/10     | 9/10     | 9/10     | 10/10    |
| Uninfected               | Lungs           | 0/10     | 0/10     | 0/10     | 0/10     |
|                          | Liver           | 0/10     | 0/10     | 0/10     | 0/10     |
|                          | Spleen          | 0/10     | 0/10     | 0/10     | 0/10     |
|                          | Small intestine | 0/10     | 0/10     | 0/10     | 0/10     |
|                          | Large intestine | 0/10     | 0/10     | 0/10     | 0/10     |

N = 9 or 10 mice. 0/10: no viable bacteria obtained from direct plating of organ homogenate

Supplementary Table 2 Pathology scoring of H&E stained histological sections from the intestines of mice infected with *C. jejuni* strains 11168-*O* $\Delta$ *accaA::cat* and 11168-*O*, or non-infected controls (Negative).

| Pathology                      | 24 hours        |                                            |          | 48 hours        |                                            |          | 72 hours        |                                            |          | 96 hours        |                                            |          |
|--------------------------------|-----------------|--------------------------------------------|----------|-----------------|--------------------------------------------|----------|-----------------|--------------------------------------------|----------|-----------------|--------------------------------------------|----------|
|                                | 11168- <i>O</i> | 11168- <i>O</i> $\Delta$ <i>accaA::cat</i> | Negative | 11168- <i>O</i> | 11168- <i>O</i> $\Delta$ <i>accaA::cat</i> | Negative | 11168- <i>O</i> | 11168- <i>O</i> $\Delta$ <i>accaA::cat</i> | Negative | 11168- <i>O</i> | 11168- <i>O</i> $\Delta$ <i>accaA::cat</i> | Negative |
| <b>Small intestine</b>         |                 |                                            |          |                 |                                            |          |                 |                                            |          |                 |                                            |          |
| Goblet cell loss (>10%)        | 2/3             | 4/10                                       | 1/2      | 2/3             | 8/10                                       | 1/3      | 1/3             | 6/10                                       | 1/3      | 2/3             | 7/10                                       | 1/3      |
| Lamina propria neutrophils     | 0/3             | 0/10                                       | 1/2      | 1/3             | 4/10                                       | 0/3      | 0/3             | 1/10                                       | 1/3      | 1/3             | 0/10                                       | 0/3      |
| Inflammatory cell infiltration | 2/3             | 9/10                                       | 1/2      | 2/3             | 8/10                                       | 0/3      | 2/3             | 6/10                                       | 1/3      | 2/3             | 5/10                                       | 0/3      |
| <b>Large intestine</b>         |                 |                                            |          |                 |                                            |          |                 |                                            |          |                 |                                            |          |
| Goblet cell loss (>10%)        | 3/3             | 10/10                                      | 2/2      | 2/3             | 10/10                                      | 3/3      | 2/3             | 10/10                                      | 3/3      | 3/3             | 10/10                                      | 3/3      |
| Goblet cell hypertrophy        | 2/3             | 5/10                                       | 2/2      | 2/3             | 5/10                                       | 0/3      | 2/3             | 5/10                                       | 3/3      | 2/3             | 7/10                                       | 2/3      |
| Lamina propria neutrophils     | 3/3             | 10/10                                      | 2/2      | 3/3             | 10/10                                      | 3/3      | 3/3             | 7/10                                       | 2/3      | 2/3             | 10/10                                      | 2/3      |
| Inflammatory cell infiltration | 3/3             | 10/10                                      | 2/2      | 2/3             | 10/10                                      | 3/3      | 2/3             | 10/10                                      | 2/3      | 2/3             | 10/10                                      | 2/3      |

N = 2-10 mice.

Supplementary Table 3 Motility assessment

|        | 11168-O<br>wild-type | 11168-O<br><i>ΔccaA::cat</i> | 11168-O <i>ccaA</i> +/-<br>complement |
|--------|----------------------|------------------------------|---------------------------------------|
| $D_t$  | 30.45 ± 20.39        | 94.01 ± 41.06                | 31.15 ± 29.37                         |
| Ø (mm) | 3.25 ± 0.5           | 7.25 ± 1.89                  | 3.13 ± 0.25                           |

Total linear displacement of bacterial cells was determined by single cell tracking of fluorescently labelled (CFDA-SE) *C. jejuni*. Time-lapse image acquisition was performed at 2ms intervals using Nikon Ti-E inverted microscope at Griffith Imaging & Image Analysis Facility. Total displacement ( $D_t$ ) =  $\sqrt{(D_x)^2 + (D_y)^2}$ , where  $D_x$  is final position<sub>x-axis</sub> minus start position<sub>x-axis</sub>, and  $D_y$  is final position<sub>y-axis</sub> minus start position<sub>y-axis</sub>. Data represents the average and standard deviation of 12 cell traces per strain. The average diameter (Ø) was measured from a swarm plate assay, where the diameter of bacteria after 24 hours. Data represents the average data and standard deviation from three replicates.

Supplementary Table 4 Bacterial counts within organs of chickens infected with *C. jejuni* strains 11168- $\Delta$ *ccaA::cat* and 11168-O, or non-infected controls (Negative).

| Organ           | 24 hours                         |         |          | 48 hours                         |         |          | 72 hours                         |         |          | 96 hours                         |         |          |
|-----------------|----------------------------------|---------|----------|----------------------------------|---------|----------|----------------------------------|---------|----------|----------------------------------|---------|----------|
|                 | 11168- $\Delta$ <i>ccaA::cat</i> | 11168-O | Negative | 11168- $\Delta$ <i>ccaA::cat</i> | 11168-O | Negative | 11168- $\Delta$ <i>ccaA::cat</i> | 11168-O | Negative | 11168- $\Delta$ <i>ccaA::cat</i> | 11168-O | Negative |
| Lungs           | 10/10                            | 9/9     | 0/10     | 10/10                            | 9/9     | 0/10     | 10/10                            | 6/9     | 0/10     | 8/8                              | 9/9     | 0/10     |
| Liver           | 1/10                             | 0/9     | 0/10     | 0/8                              | 3/9     | 0/10     | 0/10                             | 1/9     | 0/10     | 0/8                              | 0/9     | 0/10     |
| Spleen          | 1/10                             | 0/9     | 0/10     | 0/8                              | 3/9     | 0/10     | 0/10                             | 0/9     | 0/10     | 0/8                              | 0/9     | 0/10     |
| Small intestine | 9/10                             | 9/9     | 0/10     | 8/8                              | 9/9     | 0/10     | 10/10                            | 9/9     | 0/10     | 8/8                              | 9/9     | 0/10     |
| Large intestine | 9/10                             | 9/9     | 0/10     | 8/8                              | 9/9     | 0/10     | 10/10                            | 9/9     | 0/10     | 8/8                              | 9/9     | 0/10     |

1/10: one chicken out of ten positive for *Campylobacter* from direct plating of organ homogenate. N= 8-10 chicks

Supplementary Table 5 Pathology scoring of H&E stained histological sections from the intestines of chickens infected with *C. jejuni* strains 11168-O $\Delta$ *ccaA::cat* and 11168-O, or non-infected controls (Negative).

| Pathology                      | 24 hours |                                   |          | 48 hours |                                   |          | 72 hours |                                   |          | 96 hours |                                   |          |
|--------------------------------|----------|-----------------------------------|----------|----------|-----------------------------------|----------|----------|-----------------------------------|----------|----------|-----------------------------------|----------|
|                                | 11168-O  | 11168-O $\Delta$ <i>ccaA::cat</i> | Negative | 11168-O  | 11168-O $\Delta$ <i>ccaA::cat</i> | Negative | 11168-O  | 11168-O $\Delta$ <i>ccaA::cat</i> | Negative | 11168-O  | 11168-O $\Delta$ <i>ccaA::cat</i> | Negative |
| <b>Small intestine</b>         |          |                                   |          |          |                                   |          |          |                                   |          |          |                                   |          |
| Inflammatory cell infiltration | 0/3      | 0/5                               | 0/2      | 0/3      | 1/5                               | 0/2      | 0/3      | 1/5                               | 0/2      | 3/3      | 0/5                               | 1/2      |
| Villus epithelium shedding     | 1/3      | 4/5                               | 2/2      | 2/3      | 5/5                               | 2/2      | 1/3      | 4/5                               | 2/2      | 3/3      | 5/5                               | 1/2      |
| Goblet cell loss (>10%)        | 0/3      | 0/5                               | 0/2      | 0/3      | 0/5                               | 0/2      | 0/3      | 0/5                               | 0/2      | 0/3      | 0/5                               | 0/2      |
| <b>Large intestine</b>         |          |                                   |          |          |                                   |          |          |                                   |          |          |                                   |          |
| Inflammatory cell infiltration | 0/3      | 0/5                               | 1/2      | 0/3      | 1/5                               | 0/2      | 0/3      | 0/5                               | 0/2      | 0/3      | 0/5                               | 1/2      |
| Villus epithelium shedding     | 1/3      | 2/5                               | 1/2      | 0/3      | 3/5                               | 2/2      | 0/3      | 1/5                               | 2/2      | 0/3      | 4/5                               | 0/2      |
| Goblet cell loss (>10%)        | 0/3      | 0/5                               | 1/2      | 0/3      | 0/5                               | 0/2      | 0/3      | 1/5                               | 0/2      | 0/3      | 0/5                               | 0/2      |

Inflammatory cell infiltrate: increased leukocytes in lamina propria. Villus epithelium shedding: noticeable damage to tip of villi. 1/5: one positive result from 5 slides analysed.

Supplementary Table 6 Glycan array composition

| <b>Code</b> | <b>Structure</b>                                                                 |
|-------------|----------------------------------------------------------------------------------|
|             | <b>Terminal Galactose</b>                                                        |
| 1A          | Lacto- <i>N</i> -Biose I                                                         |
| 1B          | <i>N</i> -Acetyllactosamine                                                      |
| 1C          | $\beta$ -1-4-galactosyl-galactose                                                |
| 1D          | $\beta$ -1-6 Galactosyl- <i>N</i> -acetyl glucosamine                            |
| 1E          | $\beta$ -1-3 Galactosyl- <i>N</i> -acetyl galactosamine                          |
| 1F          | $\beta$ -1-3 Gal- <i>N</i> -Acetyl galactosaminy- $\beta$ 1-4Gal- $\beta$ 1-4Glc |
| 1G          | Lacto- <i>N</i> -tetraose                                                        |
| 1H          | Lacto- <i>N</i> -neotetraose                                                     |
| 1I          | Lacto- <i>N</i> -neohexaose                                                      |
| 1J          | Lacto- <i>N</i> -hexaose                                                         |
| 1K          | Globotriose                                                                      |
| 1L          | Tn Antigen GalNAc $\alpha$ 1-O-Ser                                               |
| 1M          | Galactosyl-Tn Antigen                                                            |
| 1N          | $\alpha$ 1-3 Galactobiose                                                        |
| 1O          | Linear B-2 Trisaccharide                                                         |
| 1P          | Linear B-6 Trisaccharide                                                         |
| 2A          | $\alpha$ 1-3, $\beta$ 1-4, $\alpha$ 1-3 Galactotetraose                          |
| 2B          | Gal $\beta$ 1-6Gal                                                               |
| 2C          | GalNAc $\beta$ 1-3 Gal                                                           |
| 2D          | GalNAc $\beta$ 1-4 Gal                                                           |
| 2E          | Gal $\alpha$ 1-4Gal $\beta$ 1-4GlcNAc                                            |
| 2F          | GalNAc $\alpha$ 1-3Gal $\beta$ 1-4Glc                                            |
|             | <b>Terminal N` Acetyl glucosamine</b>                                            |
| 4A          | <i>N,N</i> '-Diacetyl chitobiose                                                 |
| 4B          | <i>N,N,N</i> '-Tiacetyl chitotriose                                              |

- 4C *N,N,N'',N'''*-Tetraacetyl chitotetraose  
4D *N,N,N'',N''',N''''*-Hexaacetyl chitohexasose  
4E GlcNAc $\beta$ 1-4MurNAc
- 

**Mannose containing structures**

- 5A  $\beta$ 1-2 *N*-Acetylglucosamine-mannose  
5B Biantennary *N*-linked core pentasaccharide  
5C  $\alpha$ 1-2-Mannobiose  
5D  $\alpha$ 1-3-Mannobiose  
5E  $\alpha$ 1-4-Mannobiose  
5F  $\alpha$ 1-6-Mannobiose  
5G  $\alpha$ 1-3,  $\alpha$ 1-6-Mannobiose  
5H  $\alpha$ 1-3,  $\alpha$ 1-3,  $\alpha$ 1-6-Mannopentaose
- 

**Fucosylated structures**

- 7A Lacto- *N*-fucopentaose I  
7B Lacto- *N*-fucopentaose II  
7C Lacto- *N*-fucopentaose III  
7D Lacto- *N*-difucohexaose I  
7E Lacto- *N*-difucohexaose II  
7F H-disaccharide  
7G 2`-Fucosyllactose  
7H 3`-Fucosyllactose  
7I Lewis<sup>x</sup>  
7J Lewis<sup>a</sup>  
7K Blood group A trisaccharide  
7L Lactodifucotetraose (LDFT)  
7M Blood group B trisaccharide  
7N Lewis<sup>y</sup>  
7O Blood group H type II trisaccharide



|    |                                              |
|----|----------------------------------------------|
| 7P | Lewis <sup>b</sup> tetrasaccharide           |
| 8A | Sulpho Lewis <sup>a</sup>                    |
| 8B | Sulpho Lewis <sup>x</sup>                    |
| 8C | Monofucosyl-para-lacto- <i>N</i> -hexaose IV |
| 8D | Monofucosyllacto- <i>N</i> -hexaose III      |
| 8E | Difucosyllacto- <i>N</i> -hexaose            |
| 8F | Tifucosyllacto- <i>N</i> -hexaose            |

---

**Sialylated or Neu5Ac containing structures**

|     |                                                   |
|-----|---------------------------------------------------|
| 10A | Sialyl Lewis <sup>a</sup> (S Lea)                 |
| 10B | Sialyl Lewis <sup>x</sup> (S Lex)                 |
| 10C | Sialyllactos- <i>N</i> -tetraose a                |
| 10D | Monosialyl, monofucosyllacto- <i>N</i> -neohexose |
| 10K | 3`-Sialyllactosamine                              |
| 10L | 6`-Sialyllactosamine                              |
| 10M | LS-Tetrasaccharide a (LSTa)                       |
| 10N | LS-Tetrasaccharide b (LSTb)                       |
| 10O | LS-Tetrasaccharide c (LSTc)                       |
| 10P | Disialyllacto- <i>N</i> -tetraose                 |
| 11A | 3`-Sialyllactose                                  |
| 11B | 6`-Sialyllactose                                  |
| 11C | Colominic acid                                    |
| 11D | Biantennary 2,6-sialylated- <i>N</i> -glycan-Asn  |

---

**Carageenan and Glycoaminoglycans (GAGs)**

|     |                                                                                         |
|-----|-----------------------------------------------------------------------------------------|
| 12A | Neocarratetraose-4 <sup>1,3</sup> -di-O-sulphate (Na <sup>+</sup> )                     |
| 12B | Neocarratetraose-4 <sup>1</sup> -O-sulphate (Na <sup>+</sup> )                          |
| 12C | Neocarrahexaose-2 <sup>4</sup> ,4 <sup>1,3,5</sup> -tetra-O-sulphate (Na <sup>+</sup> ) |
| 12D | Neocarrahexaose-4 <sup>1,3,5</sup> -tri-O-sulphate (Na <sup>+</sup> )                   |
| 12E | Neocarraoctaose-4 <sup>1,3,5,7</sup> -tetra-O-sulphate (Na <sup>+</sup> )               |

|     |                                                                             |
|-----|-----------------------------------------------------------------------------|
| 12F | Neocarradecaose-4 <sup>1,3,5,7,9</sup> -penta-O-sulphate (Na <sup>+</sup> ) |
| 12G | ΔUA-2S-GlcNS-6S                                                             |
| 12H | ΔUA-GlcNS-6S                                                                |
| 12I | ΔUA-2S-GlcNS                                                                |
| 12J | ΔUA-2S-GlcNAc-6S                                                            |
| 12K | ΔUA-GlcNAc-6S                                                               |
| 12L | ΔUA-2S-GlcNAc                                                               |
| 12M | ΔUA-GlcNAc                                                                  |
| 12N | ΔUA-GalNAc-4S (Delta Di-4S)                                                 |
| 12O | ΔUA-GalNAc-6S (Delta Di-6S)                                                 |
| 12P | ΔUA-GalNAc-4S,6S (Delta Di-disE)                                            |
| 13A | ΔUA-2S-GalNAc-4S (Delta Di-disB)                                            |
| 13B | ΔUA-2S-GalNAc-6S (Delta Di-disD)                                            |
| 13C | ΔUA-2S-GalNAc-4S-6S (Delta di-tisS)                                         |
| 13D | ΔUA-2S-GalNAc-6S (Delta Di-UA2S)                                            |
| 13E | ΔUA-GlcNAc (Delta Di-HA)                                                    |
| 13F | Hyaluronan fragment (4mer)                                                  |
| 13G | Hyaluronan fragment (8mer)                                                  |
| 13H | Hyaluronan fragment (10mer)                                                 |
| 13I | Hyaluronan fragment (12mer)                                                 |
| 13J | Heparin                                                                     |
| 13K | Chondroitin sulfate                                                         |
| 13L | Dermatan sulfate                                                            |
| 13M | Chondroitin 6-sulfate                                                       |

---

Supplementary Table 7 Primers used in this study.

| Primer name           | 5`-3` primer sequence.                            | Source |
|-----------------------|---------------------------------------------------|--------|
| Tlp1p F               | TTG TTA TCG TTT ACG CTG ATG                       | 1      |
| Tlp1p R               | TGG AAG ATC TTT ATT ATA ATT TTT TAA GGG<br>TTT AA | 1      |
| IL-8 chick F          | GCC CTC CTC CTG GTT TCA G                         | 2      |
| IL-8 chick R          | TGG CAC CGC CAG CTC ATT                           | 2      |
| CXCLi1 chick F        | CCAGTGCATAGAGACTCATTCCAA                          | 3      |
| CXCLi1 chick R        | TGC CCA TCT TTC AGA GTA GCT ATG AAC T             | 3      |
| IL-6 chick F          | GCT CGC CGG CTT CGA                               | 4      |
| IL-6 chick R          | GGT AGG TCT GAA AGG CGA ACA G                     | 4      |
| IL-1 $\beta$ chick F  | GCT CTA CAT GTC GTG TGT GAT GAG                   | 5      |
| IL-1 $\beta$ chick R  | TGT CGA TGT CCC GCA TGA                           | 5      |
| TNF- $\alpha$ chick F | GAC TAG GCT CCC ACA CTA CC                        | 6      |
| TNF- $\alpha$ chick R | ACT GGG CGG TCA TAG AAC AG                        | 6      |
| INF $\gamma$ chick F  | GTG AAG AAG GTG AAA GAT ATC ATG GA                | 5      |
| INF $\gamma$ chick R  | GCT TTG CGC TGG ATT CTC A                         | 5      |
| CdtA F                | ATG CAA AAA ATT ATA GTT                           | 7      |
| CdtA R                | TCA TCG TAC CTC TCC TTG                           | 7      |
| CdtB F                | ATC TTT TAA CCT TGC TTT TGC A                     | 7      |
| CdtB R                | TTG CGC TAG TTG GAA AAA CCA CT                    | 7      |
| CdtC F                | GGA GAT TTG AAA GAT TTT AGG G                     | 7      |
| CdtC R                | CAT CTT GAC AAG ATT TTG CTC C                     | 7      |
| PorA F                | TGG ACG GAT AAC GCT ATT G                         | 7      |
| PorA R                | TTG CCA TTA GCG TGT GTT TT                        | 7      |

|           |                             |   |
|-----------|-----------------------------|---|
| Peb1A F   | AGC AAT GCT AAT GCA GCA GA  | 7 |
| Peb1A R   | AGT TGC AGC TTG AGC CAC TC  | 7 |
| 28S RNA F | GGC GAA GCC AGA GGA AAC T   | 4 |
| 28S RNA R | GAC GAC CGA TTT GCA CGT C   | 4 |
| 23S RNA F | TTA TCC AAT ACC AAC ATT AGT | 8 |
| 23S RNA R | GAA GAT ACG GTG CTA TTT TG  | 8 |

- 1 Hartley-Tassell, L. E. *et al.* Identification and characterization of the aspartate chemosensory receptor of *Campylobacter jejuni*. *Mol Microbiol* **75**, 710-730, doi:MMI7010 [pii] 10.1111/j.1365-2958.2009.07010.x (2010).
- 2 Shini, S. & Kaiser, P. Effects of stress, mimicked by administration of corticosterone in drinking water, on the expression of chicken cytokine and chemokine genes in lymphocytes. *Stress* **12**, 388-399, doi:10.1080/10253890802526894 (2009).
- 3 Withanage, G. S. K. *et al.* Rapid Expression of Chemokines and Proinflammatory Cytokines in Newly Hatched Chickens Infected with *Salmonella enterica* Serovar Typhimurium. *Infection and Immunity* **72**, 2152-2159, doi:10.1128/IAI.72.4.2152-2159.2004 (2004).
- 4 Smith, C. K. *et al.* *Campylobacter jejuni*-induced cytokine responses in avian cells. *Infect Immun* **73**, 2094-2100, doi:10.1128/IAI.73.4.2094-2100.2005 (2005).
- 5 Kaiser, P. *et al.* Differential cytokine expression in avian cells in response to invasion by *Salmonella typhimurium*, *Salmonella enteritidis* and *Salmonella gallinarum*. *Microbiology* **146 Pt 12**, 3217-3226, doi:10.1099/00221287-146-12-3217 (2000).
- 6 Tabatabaei, S., Badalzadeh, R., Mohammadnezhad, G. & Balaei, R. Effects of Cinnamon extract on biochemical enzymes, TNF- $\alpha$  and NF- $\kappa$ B gene expression levels in liver of broiler chickens inoculated with *Escherichia coli*. *Pesq. Vet. Bras* **35**, 781-787 (2015).
- 7 King, R. M. *et al.* Carbohydrate binding and gene expression by in vitro and in vivo propagated *Campylobacter jejuni* after immunomagnetic separation. *Journal of basic microbiology* **53**, 240-250, doi:10.1002/jobm.201100466 (2013).
- 8 Eyers, M., Chapelle, S., Van Camp, G., Goossens, H. & De Wachter, R. Discrimination among thermophilic *Campylobacter* species by polymerase chain reaction amplification of 23S rRNA gene fragments. *Journal of Clinical Microbiology* **32**, 1623 (1994).

Supplementary Table 8 Standard curve equations

| Gene         | Standard curve equation | Primer efficiency |
|--------------|-------------------------|-------------------|
| Tlp1         | $y = 3.764 + 42.062$    | 84.3%             |
| IL-8         | $y = 1.925 + 0.206$     | 62.1%             |
| CXCLi1       | $y = 3.180 + 1.017$     | 88.1%             |
| IL-1 $\beta$ | $y = 3.339 + 26.991$    | 82.8%             |
| IL-6         | $y = 4.664 + 27.998$    | 77.9%             |
| TNF $\alpha$ | $y = 2.864 + 16.733$    | 93.2%             |
| IFN $\gamma$ | $y = 9.131 + 14.809$    | 93.0%             |
| PorA         | $y = 4.805 + 49.732$    | 61.5%             |
| Peb1A        | $y = 5.712 + 51.516$    | 49.6%             |
| CdtA         | $y = 4.408 + 46.408$    | 69.0%             |
| CdtB         | $y = 4.738 + 55.271$    | 62.6%             |
| CdtC         | $y = 2.281 + 36.538$    | 63.6%             |
| 23S RNA      | $y = 3.828 + 43.454$    | 82.1%             |
| 28S RNA      | $y = 3.428 + 2.316$     | 93.%              |

**Figure S1.** Expression of virulence genes *porA*, *peb1A* and *cdtABC*.

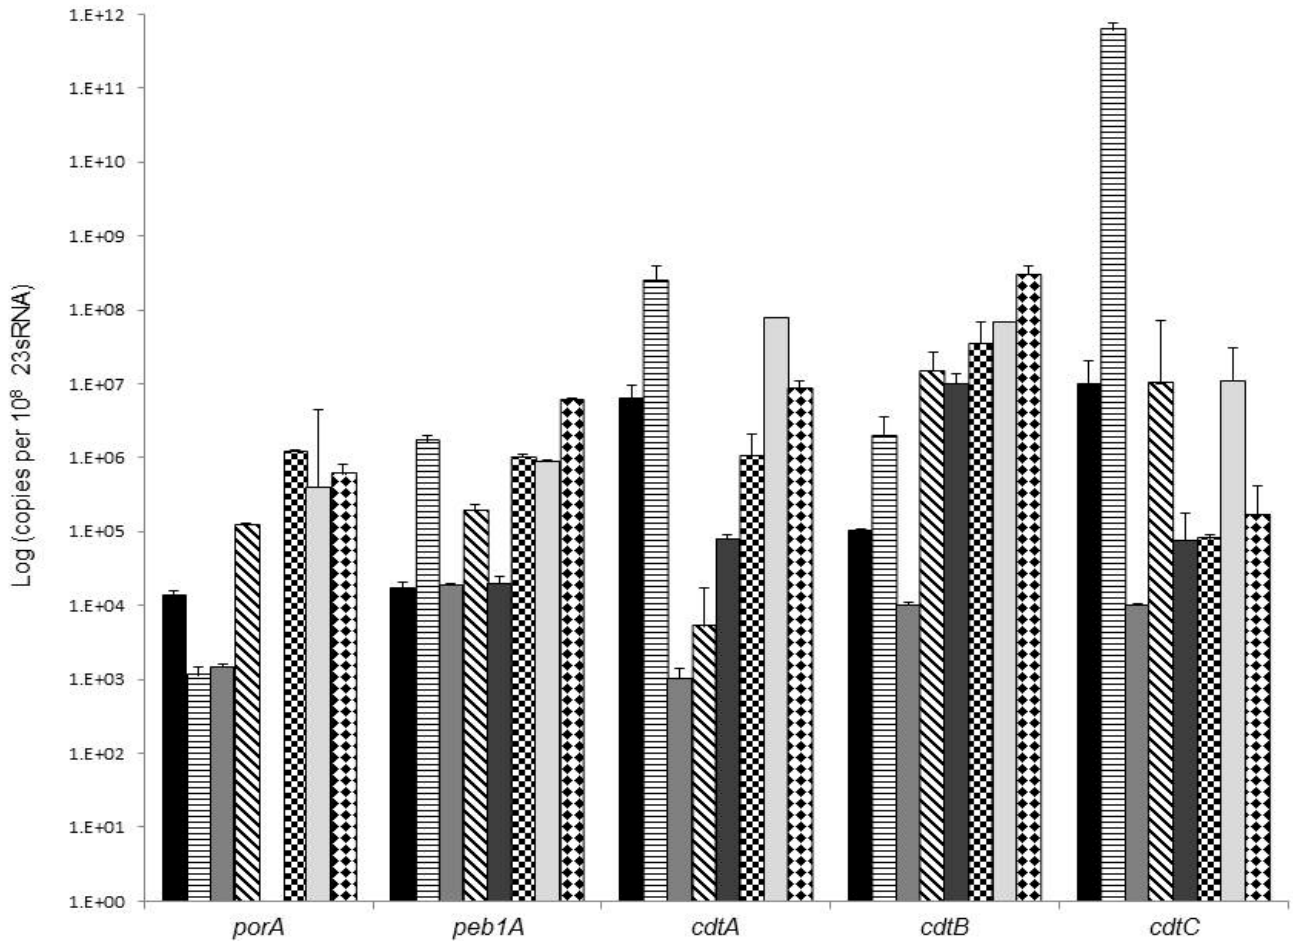

Expression levels of known virulence genes *porA*, *peb1A* and *cdtA*, *B* and *C*, from bacteria grown *in vitro* at 37°C, 42°C, and isolated by IMS *in vivo* from chicken and murine hosts. ■ *C. jejuni* 11168-O WT 37°C; ▨ *C. jejuni* 11168-OΔccaA::cat 37°C; ■ *C. jejuni* 11168-O WT 42°C; ▩ *C. jejuni* 11168-OΔccaA::cat 42°C; ■ *C. jejuni* 11168-O WT chicken; ▩ *C. jejuni* 11168-OΔccaA::cat chicken; □ *C. jejuni* 11168-O WT mouse; ▩ *C. jejuni* 11168-OΔccaA::cat mouse.
